1 **Intrinsic and effective severity of COVID-19 cases infected with the ancestral**  
2 **strain and Omicron BA.2 variant in Hong Kong**

3

4 Jessica Y. Wong<sup>1</sup>, Justin K. Cheung<sup>1</sup>, Yun Lin<sup>1</sup>, Helen S. Bond<sup>1</sup>, Eric H. Y. Lau<sup>1,2</sup>,  
5 Dennis K. M. Ip<sup>1</sup>, Benjamin J. Cowling<sup>1,2</sup>, Peng Wu<sup>1,2</sup>

6

7 **Affiliations:**

8 1. WHO Collaborating Centre for Infectious Disease Epidemiology and Control,  
9 School of Public Health, Li Ka Shing Faculty of Medicine, The University of  
10 Hong Kong, Hong Kong Special Administrative Region, China

11 2. Laboratory of Data Discovery for Health Limited, Hong Kong Science and  
12 Technology Park, New Territories, Hong Kong Special Administrative  
13 Region, China

14

15 **Corresponding author:**

16 Benjamin J. Cowling, School of Public Health, Li Ka Shing Faculty of Medicine, The  
17 University of Hong Kong, 7 Sassoon Road, Pokfulam, Hong Kong

18 Tel: +852 3917 6711; Email: [bcowling@hku.hk](mailto:bcowling@hku.hk)

19

20 Word count (abstract): 280

21 Word count (main text): 3,142

22

23 Keywords: COVID-19, intrinsic, severity, SARS-CoV-2, Omicron

24

## 25 **ABSTRACT**

26 **Background:** Understanding severity of infections with SARS-CoV-2 and its variants  
27 is crucial to inform public health measures. Here we used COVID-19 patient data  
28 from Hong Kong to characterise the severity profile of COVID-19 and to examine  
29 factors associated with fatality of infection.

30 **Methods:** Time-varying and age-specific effective severity measured by case-  
31 hospitalization risk and hospitalization risk was estimated with all individual COVID-  
32 19 case data collected in Hong Kong from 23 January 2020 through to 26 October  
33 2022 over six epidemic waves, in comparison with estimates of influenza  
34 A(H1N1)pdm09 during the 2009 pandemic. The intrinsic severity of Omicron BA.2  
35 was compared with the estimate for the ancestral strain with the data from  
36 unvaccinated patients without previous infections. Factors potentially associated with  
37 the fatality risk of hospitalized Omicron patients were also examined.

38 **Results:** With 32,222 COVID-19 hospitalizations and 9,669 deaths confirmed over 6  
39 epidemic waves in Hong Kong, the time-varying hospitalization fatality risk  
40 dramatically increased from below 10% before the largest fifth wave of Omicron  
41 BA.2, to 41% during the peak of the fifth wave when hospital resources were severely  
42 constrained. The age-specific fatality risk in unvaccinated hospitalized Omicron cases  
43 was comparable to the estimates for unvaccinated cases with the ancestral strain.  
44 During epidemics predominated by Omicron BA.2, the highest fatality risk was  
45 amongst unvaccinated patients aged  $\geq 80$  years and the risk was inversely associated  
46 with the number of vaccination doses received.

47 **Conclusions:** Omicron has comparable intrinsic severity to the ancestral Wuhan  
48 strain although the effective severity is substantially lower in Omicron cases due to  
49 vaccination. With a moderate-to-high coverage of vaccination, hospitalized COVID-

50 19 patients caused by Omicron subvariants appeared to have similar age-specific risks

51 of fatality to patients hospitalized with influenza A(H1N1)pdm09.

52

## 53 INTRODUCTION

54 Hong Kong successfully suppressed four epidemic waves of infection with the  
55 ancestral strain of SARS-CoV-2 during the first two years of the pandemic, with  
56 12,631 RT-PCR confirmed infections (1.7 cases per 1,000 population) and 213 deaths  
57 reported by the end of 2021 [1]. Serologic data confirmed that below 1% of the  
58 population had been infected over the same period [2]. However, a large community  
59 epidemic caused by Omicron subvariant peaked in early March 2022 [3, 4], leading to  
60 over 1.1 million confirmed cases (164.3 cases per 1,000 population) and 9,157 deaths.  
61 Two COVID-19 vaccines, the inactivated (CoronaVac, Sinovac) and the mRNA  
62 vaccine (BNT162b2, BioNTech/Fosun Pharma), were made available in Hong Kong  
63 in early 2021. As of 1 January 2022, approximately 70% of the Hong Kong  
64 population aged 3 years or above had received at least two doses of vaccination [5]  
65 although vaccination uptake was lower in older adults [6].

66

67 The severity profile of SARS-CoV-2 infections is one of the major determinants for  
68 assessing potential health impact of epidemics on a population [7]. One measure of  
69 infection severity is the “hospitalization fatality risk” (HFR). This describes the risk  
70 of death among hospitalized cases with laboratory-confirmed SARS-CoV-2 infections  
71 [8], which comprise a smaller and more homogenous subgroup of infected individuals  
72 requiring admission for healthcare than all laboratory-confirmed cases. A related  
73 measure of severity is the risk of hospitalization among all cases, i.e. the case  
74 hospitalization risk (CHR). The CHR multiplied by the HFR should approximate the  
75 fatality risk among all confirmed cases, i.e. the case fatality risk (CFR).

76

77 Here, we analyzed detailed individual case data from Hong Kong, to quantify the  
78 overall and temporal patterns of COVID-19 severity in Hong Kong, and identify  
79 factors associated with mortality among hospitalized COVID-19 cases. Because  
80 Omicron BA.2 was the first strain of COVID-19 to circulate widely in Hong Kong we  
81 also aim to estimate the intrinsic severity of SARS-CoV-2 variants using data on  
82 infections in unvaccinated individuals.

83

## 84 **METHODS**

### 85 *Sources of data*

86 Individual data on all laboratory-confirmed COVID-19 cases infected locally in Hong  
87 Kong from 23 January 2020 to 26 October 2022 were obtained from the Hospital  
88 Authority and Centre for Health Protection [5]. RT-PCR was used exclusively for  
89 confirmation of COVID-19 until 25 February 2022 when a positive rapid antigen test  
90 was also accepted as laboratory confirmation [9]. From 7 June 2022 onwards,  
91 individuals reporting a positive rapid antigen test were issued with a compulsory  
92 testing notice and required to undergo PCR testing within the next two days, and any  
93 individuals with negative PCR tests were not counted as COVID-19 cases [10].  
94 Demographic, clinical and epidemiological information was collected for individual  
95 patients, including age, sex, comorbidities, oxygen saturation levels measured by the  
96 pulse oximetry in hospital, severity outcome at discharge, vaccination status, use of  
97 nirmatrelvir-ritonavir (Paxlovid) or molnupiravir, residence in care homes for the  
98 elderly (RCHE), dates of COVID-19 vaccination for individual doses, laboratory  
99 confirmation, hospital admission, death and discharge. Our study received ethical  
100 approval from the Institutional Review Board of the University of Hong Kong.

101

102 Up to 14 February 2022, all laboratory-confirmed COVID-19 cases in Hong Kong  
103 were admitted into hospital for isolation, and from 15 February onwards, given the  
104 rapidly increasing number of COVID-19 cases and limited hospital capacity, only  
105 those requiring hospital medical care were admitted. In this study, we defined  
106 hospitalized cases as COVID-19 patients confirmed by RT-PCR or rapid antigen test  
107 and clinically classified as a severe, critically ill or fatal case based on assessment of  
108 oxygen desaturation, use of medication and procedure, and information such as A&E  
109 departmental visits and ICU admissions from clinical records, i.e., cases requiring  
110 healthcare in hospital. Detailed information on severity classification of COVID-19  
111 cases is shown in Appendix. We used data on patients with laboratory confirmation of  
112 SARS-CoV-2 infection obtained in the 14 days preceding hospital admission in the  
113 analysis on HFR, and used data on all patients tested positive for SARS-CoV-2 either  
114 by RT-PCR or rapid antigen test in the analysis of CHR.

115

116 For comparison, we used the data obtained from the Hospital Authority on all  
117 individual patients with laboratory-confirmed A(H1N1)pdm09 infection identified  
118 during May-December 2009 when influenza A(H1N1)pdm09 virus was first  
119 circulating and monovalent H1N1pdm09 vaccines had not been widely used in Hong  
120 Kong [11], including age, sex, dates of admission into hospital and intensive care unit,  
121 dates of receipt of oseltamivir treatment and death.

122

### 123 *Statistical analysis*

124 All COVID-19 cases confirmed in each epidemic wave or period of wave were  
125 examined in terms of age, sex, severity status and delay distributions. We estimated  
126 the effective severity of COVID-19 with the case hospitalization risk (CHR) and the

127 hospitalization fatality risk (HFR). The weekly CHR was estimated as the reported  
128 weekly number of hospitalized COVID-19 cases divided by the weekly total number  
129 of confirmed cases allowing for a mean lag of 3 days from case notification to  
130 hospitalization. The weekly HFR was calculated as the proportion of fatal cases  
131 (eventual number of deaths occurred by the end of the study period) among all  
132 hospitalized cases admitted in a particular week. We estimated the CHR and HFR in  
133 time periods during which at least 35 confirmed cases and at least 15 confirmed  
134 hospitalized cases were reported per week in 4 or more consecutive weeks in order to  
135 provide effective comparisons between different epidemic waves avoiding large  
136 uncertainties from very small case numbers. We also estimated the age-stratified CHR  
137 and HFR with the same data for five age groups: <18 years, 18-44 years, 45-64 years,  
138 65-79 years and  $\geq 80$  years for each pre-defined epidemic wave over the study period.  
139  
140 The data on COVID-19 cases without vaccination in Hong Kong before widespread  
141 of Omicron in wave 5 particularly in older adults with a low vaccination coverage  
142 allowed us to assess the intrinsic severity of SARS-CoV-2. We determined the HFR  
143 among hospitalized cases at age of <65, 65-79 and  $\geq 80$  years with complete  
144 comorbidity information. We also estimated the age-specific relative risk in  
145 logarithmic scale as the HFR in the early part of the fifth wave divided by the HFR in  
146 waves 1-4. Cases included in the analysis were confirmed before 14 February 2022  
147 without receiving any dose of COVID-19 vaccination more than 14 days prior to  
148 confirmation of COVID-19 and without a recorded previous infection. We applied  
149 logistic regression models to the daily unvaccinated hospitalized COVID-19 cases  
150 confirmed in the early part of the fifth wave and earlier epidemic waves to examine  
151 factors potentially associated with the intrinsic fatality risk of SARS-CoV-2. In the

152 regression model, we adjusted for age group, gender, comorbidities, and RCHE status.  
153 Age-specific HFR estimates were also obtained for unvaccinated cases confirmed in  
154 wave 6 for comparison.

155

156 Omicron BA.2 caused the largest epidemic wave 5 in Hong Kong since January 2022  
157 extending to wave 6 in May-August 2022. We estimated the HFR with cases  
158 confirmed during the period predominated by Omicron BA.2 by vaccine dose and  
159 type to illustrate the potential protection provided by COVID-19 vaccination. We  
160 determined the vaccine-related relative risk in logarithmic scale for the three age  
161 groups as the HFR among cases with a specific vaccine dose combination divided by  
162 the HFR among cases that did not receive any dose of COVID-19 vaccination. We  
163 performed a similar regression analysis to compare the risk of mortality for patients  
164 confirmed in wave 5. In the model, we further adjusted for vaccination type and dose,  
165 antiviral use and period of case confirmation.

166

167 We estimated the HFR of influenza A(H1N1)pdm09 with cases confirmed in 2009 as  
168 the division of cumulative number of deaths by the cumulative number of laboratory-  
169 confirmed hospitalized cases who were treated with oseltamivir or admitted into an  
170 intensive care unit during hospital stay. All analyses were conducted with R version  
171 4.1.0 (R Foundation for Statistical Computing, Austria).

172

## 173 **RESULTS**

174 The periods of spread of SARS-CoV-2 in Hong Kong can be divided into six  
175 epidemic waves, including four prior to the widespread uptake of vaccines, a large  
176 fifth wave predominated by Omicron BA.2 between January and May 2022, and a



177 sixth wave driven by Omicron BA.2 and BA.4/5 subvariants (Figure 1). A total of  
178 1,979, 22,805 and 7,438 COVID-19 cases were hospitalized for treatment in waves 1-  
179 4, wave 5 and wave 6, respectively. Of all the deaths, 88.8% (8,586/9,669) occurred  
180 within 28 days of confirmation, and 98.7% (9,548/9,669) occurred within 90 days. In  
181 the peak period of wave 5 (wave 5b, between 14 February and 29 April 2022), 0.8%  
182 (4/491), 9.6% (62/646), 22.7% (568/2,504), 31.5% (1,887/5,986) and 46.0%  
183 (5,832/12,667) of the hospitalized cases were fatal in age groups <18, 18-44, 45-64,  
184 65-79 and  $\geq 80$  years, respectively (Appendix). The median admission-to-death  
185 intervals decreased from 18 days in waves 1-4 to 8 days in the peak period of wave 5.  
186 The median admission-to-discharge intervals were very similar, decreasing from 17  
187 days to 11 days in waves 1-4 to peak period of wave 5 respectively.

188

189 From January 2020 to October 2022, the smoothed estimate of weekly CHR gradually  
190 decreased from 15.9% at the end of wave 3 to 10.5% at the end of wave 4 (Figure 1).  
191 In comparison, the weekly HFR estimates similarly declined from 18.1% (95% CI:  
192 9.2%, 27.1%) to 8.3% (95% CI: 3.0%, 13.5%) during the same time period. In waves  
193 5-6, CHR estimates were relatively stable at low levels (around 0.7%) while the HFR  
194 estimates increased substantially from 3.4% (95% CI: 0.0%, 7.7%) in late January  
195 2022, peaked at 41.3% (95% CI: 37.9%, 44.8%) in early March before declining to  
196 12.2% (95% CI: 7.9%, 16.4%) by the end of October.

197

198 The highest hospitalization risk was observed in cases aged  $\geq 65$  years (8.2%, 95% CI:  
199 8.1%, 8.3%) in wave 5, similar to cases at the same age (5.2%, 95% CI: 5.0%, 5.3%)  
200 in wave 6 (Figure 2). The CHR of cases aged 45-64 and  $\geq 65$  years in waves 1-4  
201 appeared to be approximately six times the risk in those at the same age in wave 5

202 (50.0%, 95% CI: 47.8%, 52.4%). The fatality risk of hospitalized cases aged  $\geq 65$   
203 years (41.1%, 95% CI: 40.4%, 41.8%) in wave 5 doubled the risk in individuals in the  
204 same age group in waves 1-4 (19.7%, 95% CI: 17.2%, 22.4%) and wave 6 (17.0%,  
205 95% CI: 16.0%, 18.0%), and the pattern remained the same for 45-64 years. The HFR  
206 estimates were comparable between hospitalized influenza A(H1N1)pdm09 cases in  
207 2009 and COVID-19 cases confirmed during wave 6 (Figure 2B).

208

209 There were 22,604 COVID-19 patients hospitalized in wave 5 between 31 December  
210 2021 and 22 May 2022 (Table 1). After accounting for factors associated with  
211 mortality, individuals with at least one dose of BNT162b2 or CoronaVac had  
212 significantly lower odds of mortality than those unvaccinated, with the lowest odds  
213 observed in individuals with three doses of BNT162b2 (OR: 0.31, 95% CI: 0.18,  
214 0.49). In addition to at an older age (65-79 years and  $\geq 80$  years vs 45-64 years), being  
215 an RCHE resident, having malignant neoplasms or cardiovascular diseases, and  
216 confirmed during the peak period were associated with an increased odds of mortality.  
217 Female cases, at a younger age or being treated with antivirals (Paxlovid and  
218 molnupiravir) had a lower odds of being fatal.

219

220 There were 1,974 and 186 unvaccinated COVID-19 patients hospitalized in waves 1-4  
221 and wave 5a, respectively, included in our analysis of intrinsic severity (Table 2). The  
222 age-specific estimates of HFR for cases  $\geq 80$  years (39.7%, 95% CI: 28.5%, 51.9%)  
223 and 65-79 years (19.3%, 95% CI: 10.0%, 31.9%) confirmed in wave 5a were similar  
224 to the corresponding estimates of 39.0% (95% CI: 33.1%, 45.0%) and 11.4% (95%  
225 CI: 9.0%, 14.1%) for cases in waves 1-4 (Figure 3). No significant differences in  
226 fatality risk were observed for hospitalized cases in wave 5a relative to those in waves

227 1-4 across all age groups. After accounting for factors potentially associated with  
228 mortality, hospitalized cases confirmed in wave 5a showed a similar fatality risk to  
229 the cases from waves 1-4 (OR: 1.08, 95% CI: 0.61, 1.83). The odds of mortality were  
230 significantly higher in individuals aged 65-79 years (OR: 4.80, 95% CI: 2.94, 8.26)  
231 and  $\geq 80$  years (OR: 20.81, 95% CI: 12.66, 35.95) than in individuals aged 45-64  
232 years.

233

234 Among cases hospitalized in non-peak periods of wave 5 and the first half of wave 6  
235 (wave 5a from 31 December 2021 to 13 February 2022, and waves 5c and 6a from 30  
236 April to 30 August 2022) with Omicron BA.2 predominant, mean estimates of the  
237 fatality risk were largely higher in unvaccinated patients and those receiving fewer  
238 doses of vaccine in age groups  $< 65$ , 65-79 and  $\geq 80$  years except for those with two  
239 doses of BNT162b2 showing a higher mean estimate of HFR than cases receiving one  
240 dose only or 2-dose CoronaVac among cases aged  $< 65$  years (Appendix). Relative  
241 risk estimates showed that vaccination had a considerable effect in reducing fatality  
242 risk, especially for those who received at least two doses of CoronaVac or BNT162b2  
243 in  $\geq 80$  years.

244

## 245 **DISCUSSION**

246 Infections with the Omicron variant were originally recognized as being milder than  
247 with other variants [12] although it has been challenging to determine whether the  
248 attenuated severity of Omicron infections is due to an increased competency in  
249 infecting and replicating in the upper respiratory tract [13], or acquired immunity  
250 from previous infection and/or vaccination in affected populations [14]. Our analysis  
251 of intrinsic severity was conducted based on fatalities in unvaccinated COVID-19

252 patients admitted into hospital for treatment in Hong Kong during epidemic waves  
253 predominated by the ancestral Wuhan strain or Omicron BA.2 during January 2020 –  
254 February 2022 with a relatively low population coverage of COVID-19 vaccines  
255 especially in the elderly. The estimates of HFR indicated that Omicron BA.2 had a  
256 similar intrinsic severity to infections with the ancestral strain (Table 2).  
257 Comparatively lower fatality risk in hospitalized COVID-19 patients infected with the  
258 ancestral strain or Omicron than Delta were reported in unvaccinated individuals from  
259 the UK and the US [15-18].  
260  
261 In estimation of fatality risk of COVID-19, using HFR was perhaps less biased than  
262 CFR using the number of confirmed cases as the denominator because the  
263 ascertainment of cases in need of hospital care would be relatively homogenous  
264 particularly in places with adequate capacity in case identification and healthcare  
265 services. Non-pharmaceutical and pharmaceutical measures have been widely used to  
266 slow down the transmission of COVID-19 to “flatten the curve” particularly in order  
267 to reduce the peak demand for hospital services. However, when healthcare services  
268 are under severe pressure often due to rapidly spread of infection, both hospitalized  
269 patient numbers and outcomes could be heavily affected, which would impact the  
270 HFR. Extreme pressure on hospital resources during large surges in COVID  
271 hospitalizations has been estimated to cause significantly increased COVID mortality  
272 rates in some locations, including Italy, the United States, England, and Brazil [19-  
273 23]. We estimated that the estimated HFR increased by a factor of three during the  
274 peak of the Omicron BA.2 wave in Hong Kong (Table 1). Therefore, in our analysis,  
275 we defined hospitalized COVID-19 patients with a set of pre-determined criteria  
276 (Appendix) to allow for comparison of HFR estimates across epidemic waves.

277

278 It is well established that the severity of COVID-19 increases substantially with age  
279 [24] as also shown in our age-specific estimates of HFR. The age-specific HFRs in  
280 our study indicated that a much higher fatality risk in adult cases hospitalized in the  
281 epidemic wave of Omicron than earlier waves, different from previous studies  
282 showing reduction in disease severity [25, 26]. This likely resulted from a higher  
283 proportion of older adults infected in wave 5 (Appendix) within a short time period  
284 leading to less optimal clinical outcomes in patients with constrained healthcare  
285 capacity [27].

286

287 By the end of wave 4 in December 2021, only around 12,000 COVID-19 cases were  
288 confirmed in Hong Kong [28], with a low vaccine coverage with two or more doses of  
289 either CoronaVac or BNT162b2 particularly in those  $\geq 80$  years of age [5]. We had a  
290 unique opportunity to investigate the intrinsic HFR for the Omicron in comparison  
291 with the ancestral strain by making use of fatality information collected from  
292 unvaccinated individuals, and at the same time to explore the potential protection  
293 against death from vaccines using vaccinated COVID-19 cases without a recorded  
294 infection history. Our estimation overcame some challenges in understanding the  
295 intrinsic severity of Omicron [14] while further virological and immunological  
296 evidence is needed to back up the observations from epidemiologic studies. However,  
297 we were only able to estimate intrinsic severity of Omicron BA.2 here because  
298 COVID-19 had not circulated widely in Hong Kong prior to 2022.

299

300 The estimated lower risk of death among hospitalized COVID-19 cases was indicated  
301 for vaccinees with any dose of the vaccine in comparison to the unvaccinated

302 inpatients (Table 1), largely comparable with our previous findings on the  
303 effectiveness of COVID-19 vaccines against severe COVID-19 [5]. Furthermore, the  
304 potential protection provided by Paxlovid or molnupiravir demonstrated in a local  
305 territory-wide cohort of COVID-19 inpatients and outpatients during the Omicron  
306 BA.2 wave [29, 30] perhaps could explain the lower HFR estimated in wave 6  
307 compared with wave 5c (Appendix) considering a gradually expanding use of the  
308 antivirals since mid-March 2022 in Hong Kong [31].

309

310 There are several limitations in our study. First, temporal comparison of severity  
311 estimates over epidemic waves might be affected by varied case definitions and  
312 practices in hospital admission over time [32]. We classified the severity status of  
313 laboratory-confirmed COVID-19 cases based on objective measures as much as  
314 possible, and defined hospitalized cases consistently throughout the study period,  
315 aiming to minimize bias in the denominator of HFR, and enable valid comparisons of  
316 severity measures across waves and patient groups. Second, fatality risk might differ  
317 in patients admitted due to COVID-19 and those hospitalized for other reasons and  
318 infected later with COVID-19, which might affect estimates of the HFR [25]. We  
319 limited our analysis on HFR to hospitalized patients with the confirmation 14 days  
320 earlier than the admission to exclude patients who might be infected in hospitals.  
321 Third, clinical outcomes were unknown for 1.6% of the patients who were still in  
322 hospital by the end of the study. The exact estimates of HFR for wave 6b might  
323 change slightly if final outcomes of these patients are obtained although we do not  
324 anticipate this would change our study conclusions given the small number of patients  
325 involved.

326

327 In conclusion, similar intrinsic severity of Omicron to the ancestral strain and the  
328 protection conferred by vaccines against fatality risk in hospitalized COVID-19  
329 patients highlighted that vaccination is critically important in reducing COVID-19  
330 associated health impact. Continued monitoring of epidemiologic characteristics of  
331 new variants and subvariants of SARS-CoV-2 is crucial, including assessment of  
332 effective severity. As testing and reporting cases in the community reduces in  
333 frequency, but hospital testing likely continues in many locations, data on the HFR  
334 may provide a metric that is easier to evaluate over time than CFR. Serologic data on  
335 patterns in infections over time, if available, could provide a more complete picture of  
336 changes over time in severity.

337

338

339 **ACKNOWLEDGMENTS**

340 The authors thank Julie Au for technical support.

341

342 **FUNDING**

343 This project was supported by a commissioned grant from the Health and Medical  
344 Research Fund of the Hong Kong SAR Government (grant no. CID-HKU2-13), and  
345 the Collaborative Research Scheme (project no. C7123-20G) of the Research Grants  
346 Council of the Hong Kong SAR Government. BJC is supported by the RGC Senior  
347 Research Fellow Scheme grant (HKU SRFS2021-7S03) from the Research Grants  
348 Council of the Hong Kong Special Administrative Region, China. The funding bodies  
349 had no role in the design of the study, the collection, analysis, and interpretation of  
350 data, or writing of the manuscript.

351

352 **AUTHOR CONTRIBUTIONS**

353 The study was conceived by BJC and PW. JYW, PW and JKC analyzed the data.  
354 JYW wrote the first draft of the manuscript. All authors provided critical review and  
355 revision of the text and approved the final version.

356

357 **DATA SHARING STATEMENT**

358 Restrictions apply to the availability of these data. The hospitalization and mortality  
359 data are available for access with the permission from the Hospital Authority and the  
360 Census and Statistics Department of Hong Kong.

361



362 **DECLARATION OF INTERESTS**

363 BJC consults for AstraZeneca, Fosun Pharma, GlaxoSmithKline, Haleon, Moderna,  
364 Pfizer, Roche and Sanofi Pasteur. The other authors report no other potential conflicts  
365 of interest.

366 **REFERENCES**

- 367 1. Cowling BJ, Ali ST, Ng TWY, et al. Impact assessment of non-  
368 pharmaceutical interventions against coronavirus disease 2019 and influenza  
369 in Hong Kong: an observational study. *Lancet Public Health* **2020**;5(5):e279-  
370 e88.
- 371 2. To KK, Cheng VC, Cai JP, et al. Seroprevalence of SARS-CoV-2 in Hong  
372 Kong and in residents evacuated from Hubei province, China: a multicohort  
373 study. *Lancet Microbe* **2020**;1(3):e111-e8.
- 374 3. Mefsin YM, Chen D, Bond HS, et al. Epidemiology of Infections with SARS-  
375 CoV-2 Omicron BA.2 Variant, Hong Kong, January-March 2022. *Emerg*  
376 *Infect Dis* **2022**;28(9):1856-8.
- 377 4. Viana R, Moyo S, Amoako DG, et al. Rapid epidemic expansion of the SARS-  
378 CoV-2 Omicron variant in southern Africa. *Nature* **2022**;603(7902):679-86.
- 379 5. McMenamin ME, Nealon J, Lin Y, et al. Vaccine effectiveness of one, two,  
380 and three doses of BNT162b2 and CoronaVac against COVID-19 in Hong  
381 Kong: a population-based observational study. *Lancet Infect Dis*  
382 **2022**;22(10):1435-43.
- 383 6. Xiao J, Cheung JK, Wu P, et al. Temporal changes in factors associated with  
384 COVID-19 vaccine hesitancy and uptake among adults in Hong Kong: Serial  
385 cross-sectional surveys. *Lancet Reg Health West Pac* **2022**;23:100441.
- 386 7. Wong JY, Wu P, Nishiura H, et al. Infection fatality risk of the pandemic  
387 A(H1N1)2009 virus in Hong Kong. *Am J Epidemiol* **2013**;177(8):834-40.
- 388 8. Wong JY, Kelly H, Cheung CM, et al. Hospitalization Fatality Risk of  
389 Influenza A(H1N1)pdm09: A Systematic Review and Meta-Analysis. *Am J*  
390 *Epidemiol* **2015**;182(4):294-301.

- 391 9. The Government of the Hong Kong Special Administrative Region. Selecting  
392 and using rapid antigen tests.  
393 (<https://www.info.gov.hk/gia/general/202202/27/P2022022600796.htm>).  
394 (Accessed 6 February 2023).
- 395 10. The Government of the Hong Kong Special Administrative Region. CHP  
396 investigates 82 confirmed and 132 asymptomatic additional SARS-CoV-2  
397 virus cases with 17 cases pending status by nucleic acid tests as well as  
398 verified 258 cases tested positive by rapid antigen tests.  
399 (<https://www.info.gov.hk/gia/general/202206/07/P2022060700716.htm>).  
400 (Accessed 30 December 2022).
- 401 11. Wong JY, Wu P, Lau EH, et al. Real-time estimation of the hospitalization  
402 fatality risk of influenza A(H1N1)pdm09 in Hong Kong. *Epidemiol Infect*  
403 **2016**;144(8):1579-83.
- 404 12. Wolter N, Jassat W, Walaza S, et al. Early assessment of the clinical severity  
405 of the SARS-CoV-2 omicron variant in South Africa: a data linkage study.  
406 *Lancet* **2022**;399(10323):437-46.
- 407 13. Hui KPY, Ng KC, Ho JCW, et al. Replication of SARS-CoV-2 Omicron BA.2  
408 variant in ex vivo cultures of the human upper and lower respiratory tract.  
409 *EBioMedicine* **2022**;83:104232.
- 410 14. Bhattacharyya RP, Hanage WP. Challenges in Inferring Intrinsic Severity of  
411 the SARS-CoV-2 Omicron Variant. *N Engl J Med* **2022**;386(7):e14.
- 412 15. Bast E, Tang F, Dahn J, et al. Increased risk of hospitalisation and death with  
413 the delta variant in the USA. *Lancet Infect Dis* **2021**;21(12):1629-30.
- 414 16. Robinson ML, Morris CP, Betz JF, et al. Impact of SARS-CoV-2 variants on  
415 inpatient clinical outcome. *Clin Infect Dis* **2022** (Online ahead of print).

- 416 17. Nyberg T, Ferguson NM, Nash SG, et al. Comparative analysis of the risks of  
417 hospitalisation and death associated with SARS-CoV-2 omicron (B.1.1.529)  
418 and delta (B.1.617.2) variants in England: a cohort study. *Lancet*  
419 **2022**;399(10332):1303-12.
- 420 18. Greene SK, Levin-Rector A, Kyaw NTT, et al. Comparative hospitalization  
421 risk for SARS-CoV-2 Omicron and Delta variant infections, by variant  
422 predominance periods and patient-level sequencing results, New York City,  
423 August 2021-January 2022. *Influenza Other Respir Viruses*  
424 **2023**;17(1):e13062.
- 425 19. Volpato S, Landi F, Incalzi RA. A Frail Health Care System for an Old  
426 Population: Lesson form the COVID-19 Outbreak in Italy. *J Gerontol A Biol*  
427 *Sci Med Sci* **2020**;75(9):e126-e7.
- 428 20. Dang A, Thakker R, Li S, et al. Hospitalizations and Mortality From Non-  
429 SARS-CoV-2 Causes Among Medicare Beneficiaries at US Hospitals During  
430 the SARS-CoV-2 Pandemic. *JAMA Netw Open* **2022**;5(3):e221754.
- 431 21. Gray WK, Navaratnam AV, Day J, et al. COVID-19 hospital activity and in-  
432 hospital mortality during the first and second waves of the pandemic in  
433 England: an observational study. *Thorax* **2022**;77(11):1113-20.
- 434 22. Brizzi A, Whittaker C, Servo LMS, et al. Author Correction: Spatial and  
435 temporal fluctuations in COVID-19 fatality rates in Brazilian hospitals. *Nat*  
436 *Med* **2022**;28(7):1509.
- 437 23. Janke AT, Mei H, Rothenberg C, et al. Analysis of Hospital Resource  
438 Availability and COVID-19 Mortality Across the United States. *J Hosp Med*  
439 **2021**;16(4):211-4.

- 440 24. Levin AT, Hanage WP, Owusu-Boaitey N, et al. Assessing the age specificity  
441 of infection fatality rates for COVID-19: systematic review, meta-analysis,  
442 and public policy implications. *Eur J Epidemiol* **2020**;35(12):1123-38.
- 443 25. Reichert E, Schaeffer B, Gantt S, et al. Methods for early characterisation of  
444 the severity and dynamics of SARS-CoV-2 variants: a population-based time  
445 series analysis in South Africa. *Lancet Microbe* **2022**;3(10):e753-e61.
- 446 26. Jassat W, Abdool Karim SS, Mudara C, et al. Clinical severity of COVID-19  
447 in patients admitted to hospital during the omicron wave in South Africa: a  
448 retrospective observational study. *Lancet Glob Health* **2022**;10(7):e961-e9.
- 449 27. Ko YK, Murayama H, Yamasaki L, et al. Age-Dependent Effects of COVID-  
450 19 Vaccine and of Healthcare Burden on COVID-19 Deaths, Tokyo, Japan.  
451 *Emerg Infect Dis* **2022**;28(9):1777-84.
- 452 28. The Government of the Hong Kong Special Administrative Region. CHP  
453 investigates 12 additional confirmed cases of COVID-19 and 11 additional  
454 Omicron cases.  
455 (<https://www.info.gov.hk/gia/general/202112/30/P2021123000612.htm>).  
456 (Accessed 20 January 2023).
- 457 29. Wong CKH, Au ICH, Lau KTK, et al. Real-world effectiveness of  
458 molnupiravir and nirmatrelvir plus ritonavir against mortality, hospitalisation,  
459 and in-hospital outcomes among community-dwelling, ambulatory patients  
460 with confirmed SARS-CoV-2 infection during the omicron wave in Hong  
461 Kong: an observational study. *Lancet* **2022**;400(10359):1213-22.
- 462 30. Wong CKH, Au ICH, Lau KTK, et al. Real-world effectiveness of early  
463 molnupiravir or nirmatrelvir-ritonavir in hospitalised patients with COVID-19  
464 without supplemental oxygen requirement on admission during Hong Kong's

- 465            omicron BA.2 wave: a retrospective cohort study. *Lancet Infect Dis*  
466            **2022**;22(12):1681-93.
- 467    31.    The Government of the Hong Kong Special Administrative Region. First  
468            shipment of COVID-19 oral drug Paxlovid distributed to HA for application  
469            (with photos).  
470            (<https://www.info.gov.hk/gia/general/202203/15/P2022031500280.htm>).  
471            (Accessed 20 January 2023).
- 472    32.    Tsang TK, Wu P, Lin Y, et al. Effect of changing case definitions for COVID-  
473            19 on the epidemic curve and transmission parameters in mainland China: a  
474            modelling study. *Lancet Public Health* **2020**;5(5):e289-e96.  
475

Table 1. Logistic regression of risk factors of mortality among hospitalized local COVID-19 cases confirmed in wave 5 predominated by Omicron subvariants from 31 December 2021 to 22 May 2022.

|                                              | Sample size (n) | Deaths (%) <sup>a</sup> | Non-discharged cases (%) <sup>a</sup> | Odds ratio (95% CI) <sup>b</sup> |
|----------------------------------------------|-----------------|-------------------------|---------------------------------------|----------------------------------|
| <b>Age, years</b>                            |                 |                         |                                       |                                  |
| <18                                          | 508             | 5/508 (1.0)             | 0/508 (0.0)                           | 0.03 (0.01, 0.07)                |
| 18-44                                        | 683             | 61/683 (8.9)            | 23/683 (3.4)                          | 0.45 (0.33, 0.59)                |
| 45-64                                        | 2,574           | 573/2,574 (22.3)        | 68/2,574 (2.6)                        | 1.00                             |
| 65-79                                        | 6,091           | 1,899/6,091 (31.2)      | 28/6,091 (0.5)                        | 1.50 (1.34, 1.68)                |
| ≥ 80                                         | 12,748          | 5,850/12,748 (45.9)     | 21/12,748 (0.2)                       | 2.88 (2.59, 3.21)                |
| <b>Gender</b>                                |                 |                         |                                       |                                  |
| Male                                         | 12,845          | 5,016/12,845 (39.1)     | 85/12,845 (0.7)                       | 1.00                             |
| Female                                       | 9,759           | 3,372/9,759 (34.6)      | 55/9,759 (0.6)                        | 0.76 (0.72, 0.81)                |
| <b>RCHE resident</b>                         |                 |                         |                                       |                                  |
| No                                           | 12,622          | 3,997/12,622 (31.7)     | 125/12,622 (1.0)                      | 1.00                             |
| Yes                                          | 9,982           | 4,391/9,982 (44.0)      | 15/9,982 (0.2)                        | 1.17 (1.10, 1.24)                |
| <b>Comorbidities<sup>c</sup></b>             |                 |                         |                                       |                                  |
| Diabetes                                     | 5,119           | 1,959/5,119 (38.3)      | 20/5,119 (0.4)                        | 0.96 (0.90, 1.03)                |
| Malignant neoplasms                          | 2,135           | 997/2,135 (46.7)        | 8/2,135 (0.4)                         | 2.03 (1.84, 2.24)                |
| Cardiovascular diseases                      | 9,987           | 4,420/9,987 (44.3)      | 47/9,987 (0.5)                        | 1.47 (1.39, 1.56)                |
| <b>Vaccination combinations</b>              |                 |                         |                                       |                                  |
| Unvaccinated                                 | 14,180          | 6,047/14,180 (42.6)     | 102/14,180 (0.7)                      | 1.00                             |
| One dose BNT162b2                            | 453             | 127/453 (28.0)          | 2/453 (0.4)                           | 0.67 (0.54, 0.84)                |
| One dose CoronaVac                           | 3,681           | 1,200/3,681 (32.6)      | 10/3,681 (0.3)                        | 0.71 (0.65, 0.77)                |
| Two doses BNT162b2                           | 955             | 194/955 (20.3)          | 7/955 (0.7)                           | 0.53 (0.44, 0.63)                |
| Two doses CoronaVac                          | 2,794           | 738/2,794 (26.4)        | 18/2,794 (0.6)                        | 0.58 (0.53, 0.64)                |
| Three doses BNT162b2                         | 171             | 20/171 (11.7)           | 0/171 (0.0)                           | 0.31 (0.18, 0.49)                |
| Three doses CoronaVac                        | 311             | 47/311 (15.1)           | 1/311 (0.3)                           | 0.36 (0.26, 0.49)                |
| Two doses CoronaVac<br>with BNT162b2 booster | 59              | 15/59 (25.4)            | 0/59 (0.0)                            | 0.71 (0.37, 1.29)                |

**Antiviral use**

|              |        |                     |                  |                   |
|--------------|--------|---------------------|------------------|-------------------|
| None         | 18,972 | 7,448/18,972 (39.3) | 113/18,972 (0.6) | 1.00              |
| Paxlovid     | 734    | 117/734 (15.9)      | 4/734 (0.5)      | 0.39 (0.32, 0.48) |
| Molnupiravir | 2,898  | 823/2,898 (28.4)    | 23/2,898 (0.8)   | 0.62 (0.56, 0.68) |

**Time of confirmation**

|                                    |       |                    |                |                   |
|------------------------------------|-------|--------------------|----------------|-------------------|
| Wave 5a: 31/12 - 13/2 <sup>d</sup> | 282   | 47/282 (16.7)      | 0/282 (0.0)    | 1.00              |
| Wave 5b (by week):                 |       |                    |                |                   |
| 14/2 - 20/2                        | 1,081 | 356/1,081 (32.9)   | 7/1,081 (0.6)  | 1.92 (1.36, 2.77) |
| 21/2 – 27/2 (Peak)                 | 2,509 | 1,128/2,509 (45.0) | 15/2,509 (0.6) | 3.05 (2.19, 4.32) |
| 28/2 - 6/3                         | 4,550 | 2,018/4,550 (44.4) | 38/4,550 (0.8) | 2.96 (2.14, 4.18) |
| 7/3 - 13/3                         | 4,783 | 1,913/4,783 (40.0) | 50/4,783 (1.0) | 2.49 (1.79, 3.51) |
| 14/3 - 20/3                        | 4,479 | 1,565/4,479 (34.9) | 19/4,479 (0.4) | 2.10 (1.52, 2.97) |
| 21/3 - 27/3                        | 2,222 | 671/2,222 (30.2)   | 3/2,222 (0.1)  | 1.93 (1.38, 2.74) |
| 28/3 – 3/4                         | 1,229 | 332/1,229 (27.0)   | 3/1,229 (0.2)  | 1.75 (1.24, 2.53) |
| 4/4 - 10/4                         | 590   | 156/590 (26.4)     | 3/590 (0.5)    | 1.80 (1.23, 2.66) |
| 11/4 - 17/4                        | 351   | 81/351 (23.1)      | 0/351 (0.0)    | 1.52 (1.00, 2.32) |
| 18/4 - 24/4                        | 191   | 46/191 (24.1)      | 0/191 (0.0)    | 1.74 (1.07, 2.82) |
| 25/4 - 29/4                        | 114   | 28/114 (24.6)      | 1/114 (0.9)    | 1.63 (0.93, 2.83) |
| Wave 5c: 30/4 – 22/5 <sup>d</sup>  | 223   | 47/223 (21.1)      | 1/223 (0.4)    | 1.47 (0.91, 2.35) |

<sup>a</sup> Proportions presented in the columns were defined as the number of events over the number of cases in each strata that were included in the analysis

<sup>b</sup> Analysis was based on COVID-19 cases confirmed between 31/12/2021 and 22/5/2022, classified with severity of severe or above based on criteria outlined in the Appendix and with confirmation-to-admission delays of no more than 14 days (N=22,604)

<sup>c</sup> Odds ratios were determined by comparing patients that have the listed comorbidities with patients that do not

<sup>d</sup> Wave 5a (31/12/2021 - 13/2/2022); Wave 5b (14/2/2022 - 29/4/2022); Wave 5c (30/4/2022 – 22/5/2022)



Table 2. Logistic regression of risk factors of mortality among hospitalized local COVID-19 cases that did not receive any dose of COVID-19 vaccine, waves 1-4 vs wave 5a.

|                                        | Sample size (n) | Deaths (%) <sup>a</sup> | Non-discharged cases (%) <sup>a</sup> | Odds ratio (95% CI) <sup>b</sup> |
|----------------------------------------|-----------------|-------------------------|---------------------------------------|----------------------------------|
| <b>Age, years</b>                      |                 |                         |                                       |                                  |
| <18                                    | 45              | 0/45 (0.0)              | 0/45 (0.0)                            | 0.00 (0.00, 0.00)                |
| 18-44                                  | 256             | 2/256 (0.8)             | 0/256 (0.0)                           | 0.41 (0.06, 1.43)                |
| 45-64                                  | 806             | 19/806 (2.4)            | 1/806 (0.1)                           | 1.00                             |
| 65-79                                  | 708             | 85/708 (12.0)           | 0/708 (0.0)                           | 4.80 (2.94, 8.26)                |
| ≥ 80                                   | 345             | 135/345 (39.1)          | 1/345 (0.3)                           | 20.81 (12.66, 35.95)             |
| <b>Gender</b>                          |                 |                         |                                       |                                  |
| Male                                   | 1,222           | 146/1,222 (11.9)        | 2/1,222 (0.2)                         | 1.00                             |
| Female                                 | 938             | 95/938 (10.1)           | 0/938 (0.0)                           | 0.68 (0.49, 0.92)                |
| <b>RCHE resident</b>                   |                 |                         |                                       |                                  |
| No                                     | 2,107           | 220/2,107 (10.4)        | 2/2,107 (0.1)                         | 1.00                             |
| Yes                                    | 53              | 21/53 (39.6)            | 0/53 (0.0)                            | 1.39 (0.63, 3.06)                |
| <b>Comorbidities</b>                   |                 |                         |                                       |                                  |
| None                                   | 1,493           | 85/1,493 (5.7)          | 2/1,493 (0.1)                         | 1.00                             |
| At least one comorbidity <sup>c</sup>  | 667             | 156/667 (23.4)          | 0/667 (0.0)                           | 2.89 (2.13, 3.95)                |
| <b>Confirmation period<sup>d</sup></b> |                 |                         |                                       |                                  |
| Waves 1-4                              | 1,974           | 198/1,974 (10.0)        | 2/1,974 (0.1)                         | 1.00                             |
| Wave 5a                                | 186             | 43/186 (23.1)           | 0/186 (0.0)                           | 1.08 (0.61, 1.83)                |

<sup>a</sup> Proportions presented in the columns were defined as the number of events over the number of cases in each strata that were included in the analysis

<sup>b</sup> Analysis was based on COVID-19 cases with dates of confirmation during Waves 1-4 or Wave 5a, classified with severity of severe or above based on criteria outlined in the Appendix and with confirmation-to-admission delays of no more than 14 days (N=2,160)

<sup>c</sup> If patients have at least one of the following comorbidities: diabetes, malignant neoplasms and cardiovascular diseases

<sup>d</sup> Waves 1-4 (23/1/2020 – 30/12/2021); Wave 5a (31/12/2021 – 13/2/2022)

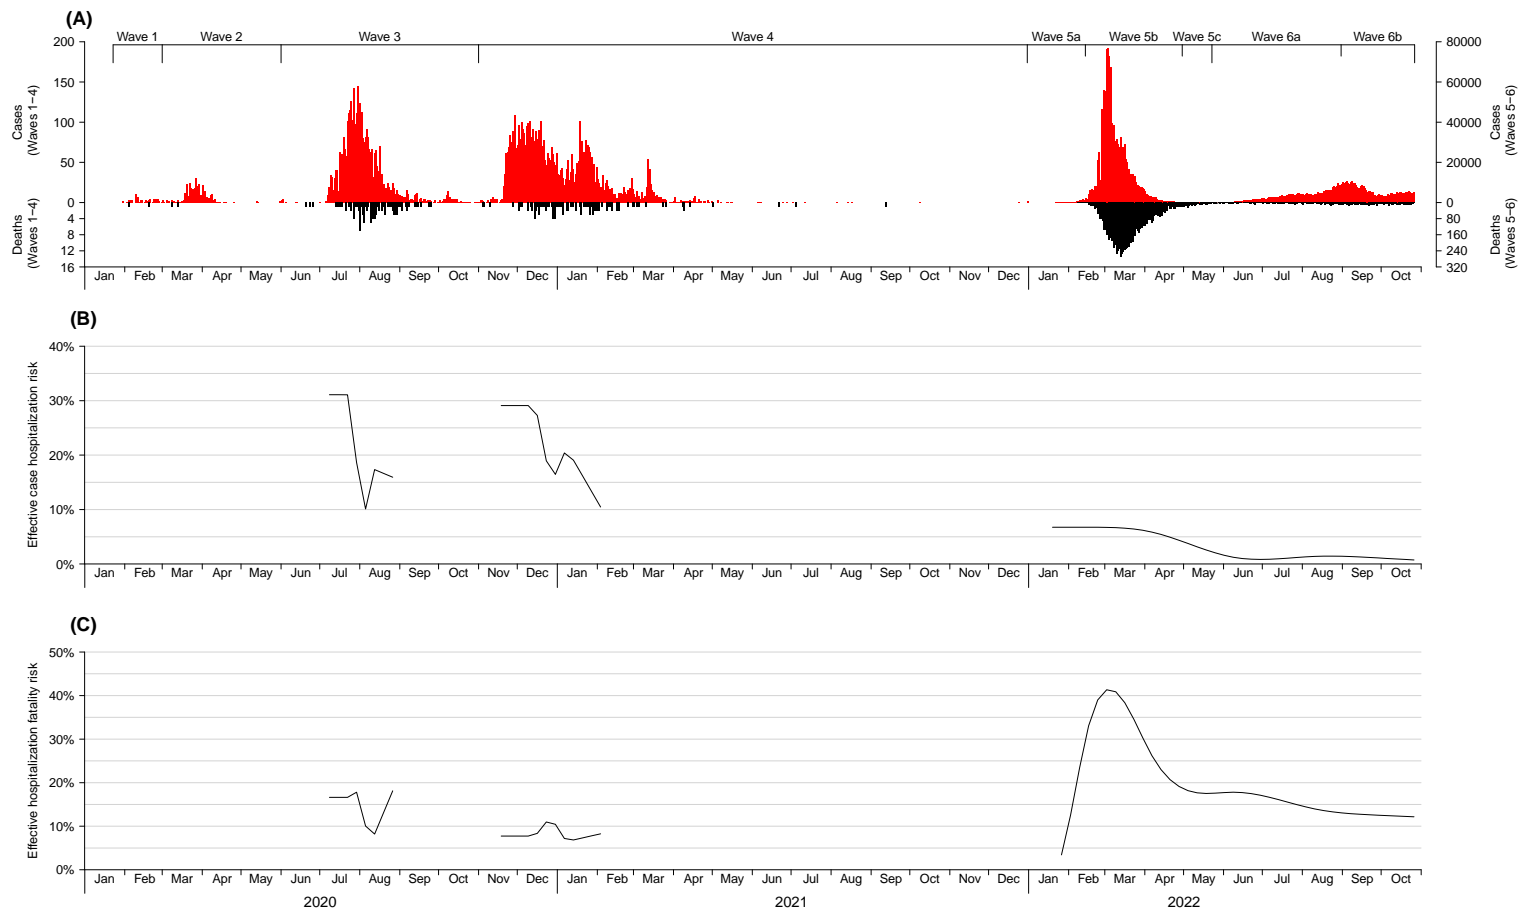

Figure 1: Local COVID-19 cases and deaths, estimated case hospitalization risk and estimated hospitalization fatality risk in Hong Kong, 2020-2022. (A) Epidemic curve of daily local COVID-19 cases and deaths in wave 1 to wave 6. Cases were stratified by date of confirmation and deaths were stratified by date of death. (B) Weekly effective case hospitalization risk. (C) Weekly effective hospitalization fatality risk. Estimates in panels (B) and (C) were only plotted for weeks when  $\geq 35$  local cases and  $\geq 15$  hospitalized cases were confirmed for at least 4 consecutive weeks.

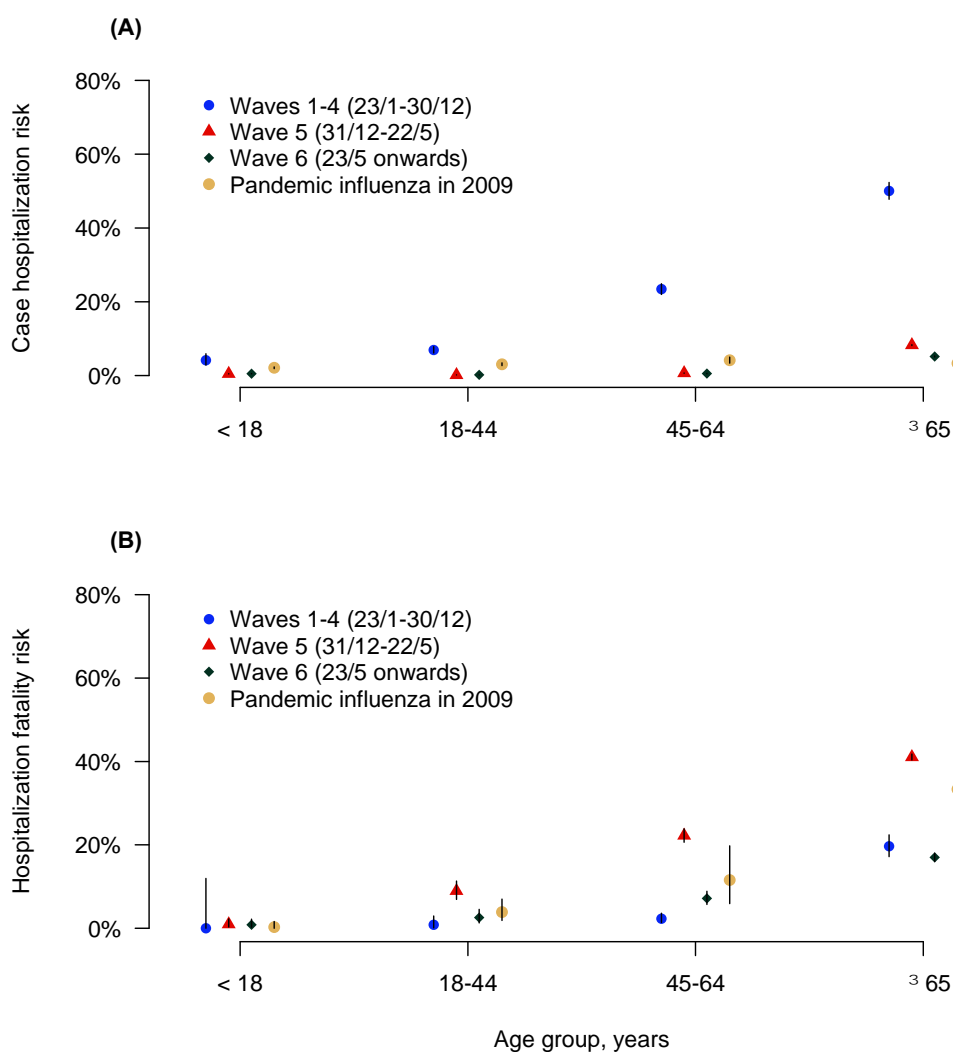

Figure 2: Age-specific estimates of the case hospitalization and hospitalization fatality risks for COVID-19 in waves 1-4, wave 5 and wave 6 in Hong Kong, compared with estimates of the hospitalization fatality risk for all hospitalized patients with pandemic influenza A(H1N1)pdm09 in 2009. (A) Case hospitalization risk in waves 1-4, 5 and 6 by age group, compared with pandemic influenza (H1N1)pdm09 in 2009. (B) Hospitalization fatality risk in waves 1-4, 5 and 6 by age group, compared with pandemic influenza (H1N1)pdm09 in 2009.

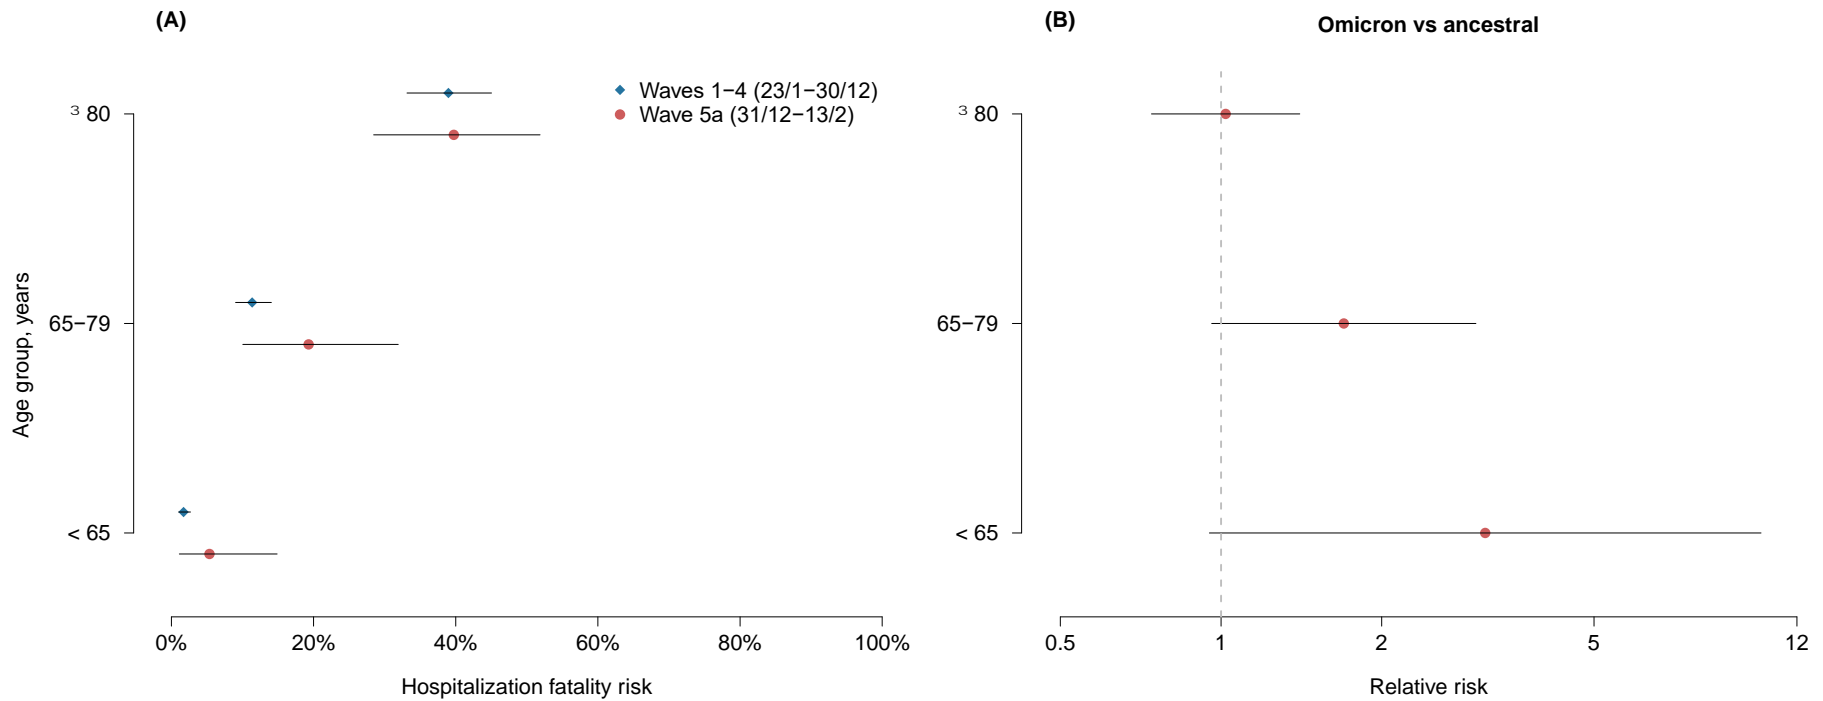

Figure 3: Age-specific estimates of the hospitalization fatality risk for COVID-19 among unvaccinated patients in Hong Kong by waves and relative risks of hospitalization fatality risk in wave 5a compared to waves 1-4. (A) Fatality risk among unvaccinated hospitalized local COVID-19 cases, in waves 1-4 compared with wave 5a by age group. (B) Relative risk of hospitalization fatality risk in wave 5a compared to waves 1-4 by age group.
